# Supplementary material for: The Effects of Mind–Body Exercises on Chronic Spinal Pain Outcomes: A Synthesis Based on 72 Meta-Analyses
Source: MDPI journal article supplement (doi:10.3390/ijerph191912062), 2022-09-23
Supplement: s1 [file s1]

Supplementary File S3. Reasons for excluding potential meta-analyzes from our umbrella review.

| Study                 | Meta-analysis                | Reason                                                                                                                                       |
|-----------------------|------------------------------|----------------------------------------------------------------------------------------------------------------------------------------------|
| Anheyer et al. 2021   | Figure 2.A                   | Two trials in this meta-analysis involved people with nonchronic pain (Kim et al. 2014 and Monro et al. 2015).                               |
| Bai et al. 2015       | Figure 3.A                   | Chronic conditions were not separately meta-analyzed.                                                                                        |
| Li et al. 2019        | Figure 3. A: 1.1.1 and 1.1.2 | Two quasi-randomized trials were included in both meta-analyzes (Dunleavy et al. 2016 and Kim, 2018).                                        |
| Nduwimana et al. 2020 | Figure 2                     | A trial in this meta-analysis involved people with non-chronic pain (Kim et al. 2014).                                                       |
| Qin et al. 2019       | Figure 2                     | The presence or absence of chronicity could not be determined in one trial (Qing et al. 2012: this trial was published in Chinese language). |
|                       | Figure 3: 1.1.2              |                                                                                                                                              |
| Zhang et al. 2019     | Figure 2                     | Interventions of interest were not separately analyzed from other interventions.                                                             |
| Zou et al. 2019       | Figure 3                     | Interventions of interest were not separately analyzed from other interventions.                                                             |
