# Supplementary material for: The Effects of Mind–Body Exercises on Chronic Spinal Pain Outcomes: A Synthesis Based on 72 Meta-Analyses
Source: MDPI journal article supplement (doi:10.3390/ijerph191912062), 2022-09-23
Supplement: s1 [file s1]

Supplementary File S2. List of reviews that were excluded by specific reasons (n = 154).

|     | Review excluded                                                                                                                                                                                                  | Reason                                                                                  |
|-----|------------------------------------------------------------------------------------------------------------------------------------------------------------------------------------------------------------------|-----------------------------------------------------------------------------------------|
| 1.  | Ahern MM, et al. The Effectiveness of Virtual Reality in Patients With Spinal Pain: A Systematic Review and Meta-Analysis. <i>Pain Pract.</i> 2020 Jul;20(6):656-675.                                            | The intervention of interest was not meta-analyzed separately from other interventions. |
| 2.  | Ammendolia C, et al. Nonoperative treatment of lumbar spinal stenosis with neurogenic claudication: a systematic review. <i>Spine (Phila Pa 1976)</i> . 2012 May 1;37(10):E609-16.                               | No intervention of interest.                                                            |
| 3.  | Ashe MC, et al. Physical Activity and Bone Health in Men: A Systematic Review and Meta-Analysis. <i>J Bone Metab.</i> 2021 Feb;28(1):27-39.                                                                      | No chronic spinal pain.                                                                 |
| 4.  | Baker MK, et al. Multi-modal exercise programs for older adults. <i>Age Ageing.</i> 2007 Jul;36(4):375-81.                                                                                                       | No chronic spinal pain.                                                                 |
| 5.  | Barros Dos Santos AO, et al. Effects of physical exercise on low back pain and cortisol levels: a systematic review with meta-analysis of randomized controlled trials. <i>Pain Manag.</i> 2021 Jan;11(1):49-57. | The intervention of interest was not meta-analyzed separately from other interventions. |
| 6.  | Benedetti MG, et al. The Effectiveness of Physical Exercise on Bone Density in Osteoporotic Patients. <i>Biomed Res Int.</i> 2018 Dec 23;2018:4840531.                                                           | No chronic spinal pain.                                                                 |
| 7.  | Bettany-Saltikov J, et al. Surgical versus non-surgical interventions in people with adolescent idiopathic scoliosis. <i>Cochrane Database Syst Rev.</i> 2015 Apr 24;(4):CD010663.                               | No intervention of interest.                                                            |
| 8.  | Binder AI. Neck pain. <i>BMJ Clin Evid.</i> 2008 Aug 4;2008:1103.                                                                                                                                                | The intervention of interest was not meta-analyzed.                                     |
| 9.  | Bolam KA, et al. The effect of physical exercise on bone density in middle-aged and older men: a systematic review. <i>Osteoporos Int.</i> 2013 Nov;24(11):2749-62.                                              | No chronic spinal pain.                                                                 |
| 10. | Braun J, et al. Treatment of ankylosing spondylitis and other spondyloarthritides. <i>Curr Opin Rheumatol.</i> 2009 Jul;21(4):324-34.                                                                            | No chronic spinal pain.                                                                 |
| 11. | Brewer S, et al. Workplace interventions to prevent musculoskeletal and visual symptoms and disorders among computer users: a systematic review. <i>J Occup Rehabil.</i> 2006 Sep;16(3):325-58.                  | No intervention of interest.                                                            |

|     | Review excluded                                                                                                                                                                                                                             | Reason                                                                      |
|-----|---------------------------------------------------------------------------------------------------------------------------------------------------------------------------------------------------------------------------------------------|-----------------------------------------------------------------------------|
| 12. | Brinzo JA, et al. The effect of yoga on depression and pain in adult patients with chronic low back pain: a systematic review protocol. JBI Database System Rev Implement Rep. 2016 Jan;14(1):56-66.                                        | Review protocol.                                                            |
| 13. | Brox JI, et al. Systematic review of back schools, brief education, and fear-avoidance training for chronic low back pain. Spine J. 2008 Nov-Dec;8(6):948-58.                                                                               | The intervention of interest was not meta-analyzed.                         |
| 14. | Bussi res AE, et al. The Treatment of Neck Pain-Associated Disorders and Whiplash-Associated Disorders: A Clinical Practice Guideline. J Manipulative Physiol Ther. 2016 Oct;39(8):523-564.e27.                                             | The intervention of interest was not meta-analyzed.                         |
| 15. | B ssing A, et al. Effects of yoga interventions on pain and pain-associated disability: a meta-analysis. J Pain. 2012 Jan;13(1):1-9.                                                                                                        | Chronic spinal pain was not meta-analyzed separately from other conditions. |
| 16. | Cai Z, et al. Effects of Tai Chi Chuan on Cognitive Function in Older Adults with Cognitive Impairment: A Systematic and Meta-Analytic Review. Evid Based Complement Alternat Med. 2020 Dec 28;2020:6683302.                                | No chronic spinal pain.                                                     |
| 17. | Chang DG, et al. Yoga as a treatment for chronic low back pain: A systematic review of the literature. J Orthop Rheumatol. 2016 Jan 1;3(1):1-8.                                                                                             | The intervention of interest was not meta-analyzed.                         |
| 18. | Choi BK, et al. Exercises for prevention of recurrences of low-back pain. Cochrane Database Syst Rev. 2010 Jan 20;2010(1):CD006555.                                                                                                         | No intervention of interest.                                                |
| 19. | Chou R, et al. Nonpharmacologic therapies for acute and chronic low back pain: a review of the evidence for an American Pain Society/American College of Physicians clinical practice guideline. Ann Intern Med. 2007 Oct 2;147(7):492-504. | The intervention of interest was not meta-analyzed.                         |
| 20. | Chou R, et al. Nonpharmacologic Therapies for Low Back Pain: A Systematic Review for an American College of Physicians Clinical Practice Guideline. Ann Intern Med. 2017 Apr 4;166(7):493-505.                                              | The intervention of interest was not meta-analyzed.                         |
| 21. | Chow TH, et al. The effect of Chinese martial arts Tai Chi Chuan on prevention of osteoporosis: A systematic review. J Orthop Translat. 2017 Jun 26;12:74-84.                                                                               | No chronic spinal pain.                                                     |

|     | Review excluded                                                                                                                                                                                                                                           | Reason                                                                                  |
|-----|-----------------------------------------------------------------------------------------------------------------------------------------------------------------------------------------------------------------------------------------------------------|-----------------------------------------------------------------------------------------|
| 22. | Collado-Mateo D, et al. Effect of exergames on musculoskeletal pain: A systematic review and meta-analysis. Scand J Med Sci Sports. 2018 Mar;28(3):760-771.                                                                                               | The intervention of interest was not meta-analyzed separately from other interventions. |
| 23. | Côté P, et al. Management of neck pain and associated disorders: A clinical practice guideline from the Ontario Protocol for Traffic Injury Management (OPTIMa) Collaboration. Eur Spine J. 2016 Jul;25(7):2000-22.                                       | The intervention of interest was not meta-analyzed.                                     |
| 24. | Cramer H, et al. Yoga for rheumatic diseases: a systematic review. Rheumatology (Oxford). 2013 Nov;52(11):2025-30.                                                                                                                                        | The intervention of interest was not meta-analyzed.                                     |
| 25. | Crevelario De Melo R, et al. Effectiveness and safety of yoga to treat chronic and acute pain: a rapid review of systematic Reviews. BMJ Open. 2021; 11:e048536.                                                                                          | Overview of reviews.                                                                    |
| 26. | Crocker T, et al. Physical rehabilitation for older people in long-term care. Cochrane Database Syst Rev. 2013 Feb 28;(2):CD004294.                                                                                                                       | No chronic spinal pain.                                                                 |
| 27. | Crow EM, et al. Effectiveness of Iyengar yoga in treating spinal (back and neck) pain: A systematic review. Int J Yoga. 2015 Jan;8(1):3-14.                                                                                                               | The intervention of interest was not meta-analyzed.                                     |
| 28. | Danielsson L, et al. Exercise in the treatment of major depression: a systematic review grading the quality of evidence. Physiother Theory Pract. 2013 Nov;29(8):573-85.                                                                                  | No chronic spinal pain.                                                                 |
| 29. | De Zoete RMJ, et al. The effectiveness of general physical exercise for individuals with chronic neck pain: a systematic review of randomised controlled Trials. European Journal of Physiotherapy. 2019;22(3):1-7.                                       | The intervention of interest was not meta-analyzed.                                     |
| 30. | De Zoete RM, et al. Comparative effectiveness of physical exercise interventions for chronic non-specific neck pain: a systematic review with network meta-analysis of 40 randomised controlled trials. Br J Sports Med. 2020 Nov 2:bjsports-2020-102664. | Network meta-analysis.                                                                  |
| 31. | Denham-Jones L, et al. A systematic review of the effectiveness of yoga on pain, physical function, and quality of life in older adults with chronic musculoskeletal conditions. Musculoskeletal Care. 2022 Mar;20(1):47-73.                              | Chronic spinal pain was not meta-analyzed separately from other conditions.             |
| 32. | Devan D. A Review of Current Therapeutic Practice for the Management of Chronic Pain. South African J of Occupational Therapy. 2014;44(1):48-51.                                                                                                          | The intervention of interest was not meta-analyzed.                                     |

|     | Review excluded                                                                                                                                                                                                      | Reason                                                                                                                                            |
|-----|----------------------------------------------------------------------------------------------------------------------------------------------------------------------------------------------------------------------|---------------------------------------------------------------------------------------------------------------------------------------------------|
| 33. | Dunlap et al. Ai Chi for Balance, Pain, Functional Mobility, and Quality of Life in Adults: A Scoping Review. J Aquat Phys Ther 2021;29:14–28.                                                                       | The intervention of interest was not meta-analyzed.                                                                                               |
| 34. | Easwaran K, et al. Effectiveness of Tai Chi for health promotion for adults with health conditions: a scoping review of Meta-analyses. Disabil Rehabil. 2021 Oct;43(21):2978-2989.                                   | Overview of reviews.                                                                                                                              |
| 35. | Elwy AR, et al. A systematic scoping review of complementary and alternative medicine mind and body practices to improve the health of veterans and military personnel. Med Care. 2014 Dec;52(12 Suppl 5):S70-82.    | No chronic spinal pain.                                                                                                                           |
| 36. | Ernst E, et al. How effective is yoga? A concise overview of systematic reviews. Focus on Alternative and Complementary Therapies. 2010;15(4):274-79.                                                                | Overview of reviews.                                                                                                                              |
| 37. | Ferreira et al. Can We Explain Heterogeneity Among Randomized Clinical Trials of Exercise for Chronic Back Pain? A Meta-Regression Analysis of Randomized Controlled Trials. Physical Therapy. 2010;90(10):1383-403. | The intervention of interest was not meta-analyzed separately from other interventions.                                                           |
| 38. | Ferro Moura Franco K, et al. Prescription of exercises for the treatment of chronic pain along the continuum of nociplastic pain: A systematic review with meta-analysis. Eur J Pain. 2021 Jan;25(1):51-70.          | The intervention of interest was not meta-analyzed separately from other interventions (Tai chi and qigong were mixed in the same meta-analysis). |
| 39. | Forsman AK, et al. Psychosocial interventions for the promotion of mental health and the prevention of depression among older adults. Health Promot Int. 2011 Dec;26 Suppl 1:i85-107.                                | No chronic spinal pain.                                                                                                                           |
| 40. | Frutiger M, et al. Systematic Review and Meta-Analysis Suggest Strength Training and Workplace Modifications May Reduce Neck Pain in Office Workers. Pain Pract. 2021 Jan;21(1):100-131.                             | No intervention of interest.                                                                                                                      |
| 41. | Geneen LJ, et al. Physical activity and exercise for chronic pain in adults: an overview of Cochrane Reviews. Cochrane Database Syst Rev. 2017 Jan 14;1(1):CD011279.                                                 | Overview of reviews.                                                                                                                              |
| 42. | Ghazi C, et al. Social cognitive or learning theory use to improve self-efficacy in musculoskeletal rehabilitation: A systematic review and meta-analysis. Physiother Theory Pract. 2018 Jul;34(7):495-504.          | The intervention of interest was not meta-analyzed separately from other interventions.                                                           |
| 43. | Gibbs JC, et al. Exercise for improving outcomes after osteoporotic vertebral fracture. Cochrane Database Syst Rev. 2019 Jul 5;7(7):CD008618.                                                                        | No intervention of interest.                                                                                                                      |

|     | Review excluded                                                                                                                                                                                                                            | Reason                                                                                  |
|-----|--------------------------------------------------------------------------------------------------------------------------------------------------------------------------------------------------------------------------------------------|-----------------------------------------------------------------------------------------|
| 44. | Girard J, et al. The effects of qigong on neck pain: A systematic review. Complement Ther Clin Pract. 2019 Feb;34:23-29.                                                                                                                   | The intervention of interest was not meta-analyzed.                                     |
| 45. | Goode AP, et al. An evidence map of yoga for low back pain. Complement Ther Med. 2016 Apr;25:170-7.                                                                                                                                        | Overview of reviews.                                                                    |
| 46. | Griffiths GS, et al. Occupational Therapy Interventions for Persistent Pain: A Systematic Review. New Zealand Journal of Occupational Therapy. 2021;68(1):15-22.                                                                           | The intervention of interest was not meta-analyzed.                                     |
| 47. | Gross AR, et al. Exercises for mechanical neck disorders: A Cochrane review update. Man Ther. 2016 Aug;24:25-45.                                                                                                                           | Abbreviated report of the included Cochrane reviews.                                    |
| 48. | Guo Y, et al. Beneficial Effects of Qigong Wuqinxi in the Improvement of Health Condition, Prevention, and Treatment of Chronic Diseases: Evidence from a Systematic Review. Evid Based Complement Alternat Med. 2018 Oct 24;2018:3235950. | The intervention of interest was not meta-analyzed.                                     |
| 49. | Gustafsson S, et al. Multi-component health promotion and disease prevention for community-dwelling frail elderly persons: a systematic review. Eur J Ageing. 2009 Oct 17;6(4):315.                                                        | The intervention of interest was not meta-analyzed.                                     |
| 50. | Gutke A, et al. Treatments for pregnancy-related lumbopelvic pain: a systematic review of physiotherapy modalities. Acta Obstet Gynecol Scand. 2015 Nov;94(11):1156-67.                                                                    | Pregnancy-related low back pain.                                                        |
| 51. | Hanada EY. Efficacy of rehabilitative therapy in regional musculoskeletal conditions. Best Pract Res Clin Rheumatol. 2003 Feb;17(1):151-66.                                                                                                | The intervention of interest was not meta-analyzed.                                     |
| 52. | Hawk C, et al. Best Practices for Chiropractic Management of Patients with Chronic Musculoskeletal Pain: A Clinical Practice Guideline. J Altern Complement Med. 2020 Oct;26(10):884-901.                                                  | Overview of reviews.                                                                    |
| 53. | Hayden JA, et al. Exercise therapy for treatment of non-specific low back pain. Cochrane Database Syst Rev. 2005 Jul 20;(3):CD000335.                                                                                                      | The intervention of interest was not meta-analyzed.                                     |
| 54. | Hayden JA, et al. Exercise therapy for chronic low back pain. Cochrane Database Syst Rev. 2021 Sep 28;9(9):CD009790.                                                                                                                       | The intervention of interest was not meta-analyzed separately from other interventions. |
| 55. | Hegmann KT, et al. Non-Invasive and Minimally Invasive Management of Low Back Disorders. J Occup Environ Med. 2020 Mar;62(3):e111-e138.                                                                                                    | The intervention of interest was not meta-analyzed.                                     |

|     | Review excluded                                                                                                                                                                                                                                              | Reason                                              |
|-----|--------------------------------------------------------------------------------------------------------------------------------------------------------------------------------------------------------------------------------------------------------------|-----------------------------------------------------|
| 56. | Hidalgo B, et al. The efficacy of manual therapy and exercise for treating non-specific neck pain: A systematic review. J Back Musculoskelet Rehabil. 2017 Nov 6;30(6):1149-1169.                                                                            | No intervention of interest.                        |
| 57. | Hill C. Is yoga an effective treatment in the management of patients with chronic low back pain compared with other care modalities - a systematic review. J Complement Integr Med. 2013 May 7;10:/j/jcim.2013.10.issue-1/jcim-2012-0007/jcim-2012-0007.xml. | The intervention of interest was not meta-analyzed. |
| 58. | Howe TE, et al. Exercise for preventing and treating osteoporosis in postmenopausal women. Cochrane Database Syst Rev. 2011 Jul 6;(7):CD000333.                                                                                                              | No outcome of interest.                             |
| 59. | Hu X, et al. Effects of exercise therapy for pregnancy-related low back pain and pelvic pain: A protocol for systematic review and meta-analysis. Medicine (Baltimore). 2020 Jan;99(3):e17318.                                                               | Review protocol.                                    |
| 60. | Huang YC, et al. Culturally-tailored interventions for chronic disease self-management among Chinese Americans: a systematic review. Ethn Health. 2020 Apr;25(3):465-484.                                                                                    | The intervention of interest was not meta-analyzed. |
| 61. | Jasmin M, et al. Effectiveness of Yoga Intervention for Chronic Neck Pain: A Systematic Literature Review. International Journal of Caring Sciences. 2019;12(2):1088-1096.                                                                                   | The intervention of interest was not meta-analyzed. |
| 62. | Jones K, et al. Interventions for promoting physical activity in people with neuromuscular disease. Cochrane Database Syst Rev. 2021 May 24;5(5):CD013544.                                                                                                   | No chronic spinal pain.                             |
| 63. | Joyppaul S, et al. Multi-disciplinary interventions for chronic pain involving education: A systematic review. PLoS One. 2019 Oct 2;14(10):e0223306.                                                                                                         | The intervention of interest was not meta-analyzed. |
| 64. | Kader M, et al. Physical activity and exercise during pregnancy. European Journal of Physiotherapy. 2014;16:2-9.                                                                                                                                             | Pregnancy-related low back pain.                    |
| 65. | Kay TM, et al. Exercises for mechanical neck disorders. Cochrane Database Syst Rev. 2012 Aug 15;(8):CD004250.                                                                                                                                                | Previous versions of included Cochrane Reviews      |
| 66. | Kelley GA, et al. Exercise and bone mineral density in men: a meta-analysis of randomized controlled trials. Bone. 2013 Mar;53(1):103-11.                                                                                                                    | No chronic spinal pain.                             |
| 67. | Kelley GA, et al. Meditative Movement Therapies and Health-Related Quality-of-Life in Adults: A Systematic Review of Meta-Analyses. PLoS One. 2015 Jun 8;10(6):e0129181.                                                                                     | Overview of reviews.                                |
| 68. | Ketenci A, et al. Pharmacological and non-pharmacological treatment approaches to chronic lumbar back pain. Turk J Phys Med Rehabil. 2021 Mar 4;67(1):1-10.                                                                                                  | The intervention of interest was not meta-analyzed. |

|     | Review excluded                                                                                                                                                                                                                                           | Reason                                              |
|-----|-----------------------------------------------------------------------------------------------------------------------------------------------------------------------------------------------------------------------------------------------------------|-----------------------------------------------------|
| 69. | Kim SD. Effects of yoga on chronic neck pain: a systematic review of randomized controlled trials. J Phys Ther Sci. 2016 Jul;28(7):2171-4.                                                                                                                | The intervention of interest was not meta-analyzed. |
| 70. | Kim KV, et al. Effect of yoga on health-related outcomes in people at risk of fractures: a systematic review. Appl Physiol Nutr Metab. 2022 Mar;47(3):215-226.                                                                                            | The intervention of interest was not meta-analyzed. |
| 71. | Kinser PA, et al. Physical Activity and Yoga-Based Approaches for Pregnancy-Related Low Back and Pelvic Pain. J Obstet Gynecol Neonatal Nurs. 2017 May-Jun;46(3):334-346.                                                                                 | Pregnancy-related low back pain.                    |
| 72. | Koukoulithras I Sr, et al. The Effectiveness of Non-Pharmaceutical Interventions Upon Pregnancy-Related Low Back Pain: A Systematic Review and Meta-Analysis. Cureus. 2021 Jan 30;13(1):e13011.                                                           | Pregnancy-related low back pain.                    |
| 73. | Larmer PJ, et al. Hydrotherapy outcome measures for people with arthritis: A systematic review. New Zealand Journal of Physiotherapy. 2014;42(2):54-67.                                                                                                   | No chronic spinal pain.                             |
| 74. | Leaver AM, et al. Conservative interventions provide short-term relief for non-specific neck pain: a systematic review. J Physiother. 2010;56(2):73-85.                                                                                                   | No intervention of interest.                        |
| 75. | Lee MS, et al. Tai chi for osteoporosis: a systematic review. Osteoporos Int. 2008 Feb;19(2):139-46.                                                                                                                                                      | No chronic spinal pain.                             |
| 76. | Lee MS, et al. Internal qigong for pain conditions: a systematic review. J Pain. 2009 Nov;10(11):1121-1127.e14.                                                                                                                                           | The intervention of interest was not meta-analyzed. |
| 77. | Lee C, et al. An analysis of the various chronic pain conditions captured in a systematic review of active self-care complementary and integrative medicine therapies for the management of chronic pain symptoms. Pain Med. 2014 Apr;15 Suppl 1:S96-103. | The intervention of interest was not meta-analyzed. |
| 78. | Lemieux J, et al. Comparing the effectiveness of group-based exercise to other non-pharmacological interventions for chronic low back pain: A systematic review. PLoS One. 2020 Dec 30;15(12):e0244588.                                                   | The intervention of interest was not meta-analyzed. |
| 79. | Leung KW, et al. Mind-Body Health Benefits of Traditional Chinese Qigong on Women: A Systematic Review of Randomized Controlled Trials. Evid Based Complement Alternat Med. 2021 Sep 14;2021:7443498.                                                     | The intervention of interest was not meta-analyzed. |

|     | Review excluded                                                                                                                                                                                         | Reason                                                                                                                                                              |
|-----|---------------------------------------------------------------------------------------------------------------------------------------------------------------------------------------------------------|---------------------------------------------------------------------------------------------------------------------------------------------------------------------|
| 80. | Lewis A, et al. Are physiotherapy exercises effective in reducing chronic low back pain? Physical Therapy Reviews. 2008;13(1):37-44.                                                                    | The intervention of interest was not meta-analyzed.                                                                                                                 |
| 81. | Lewis GN, et al. How Have Chronic Pain Management Programs Progressed? A Mapping Review. Pain Pract. 2019 Sep;19(7):767-784.                                                                            | The intervention of interest was not meta-analyzed.                                                                                                                 |
| 82. | Li G, et al. Effects of Tai Chi on health related quality of life in patients with chronic conditions: a systematic review of randomized controlled trials. Complement Ther Med. 2014 Aug;22(4):743-55. | The intervention of interest was not meta-analyzed.                                                                                                                 |
| 83. | Li H, et al. Baduanjin exercise for low back pain: A systematic review and meta-analysis. Complement Ther Med. 2019 Apr;43:109-116.                                                                     | Chronic spinal pain was not meta-analyzed separately from other conditions (some trials did not report the phase of low back pain).                                 |
| 84. | Li G, et al. The effect of whole body vibration on health-related quality of life in patients with chronic conditions: a systematic review. Qual Life Res. 2019 Nov;28(11):2859-2870.                   | No intervention of interest.                                                                                                                                        |
| 85. | Li Z, et al. Therapeutic Effects of Traditional Chinese Exercises on Musculoskeletal Pain: A Systematic Review and Meta-Analysis. Pain Res Manag. 2021 May 10;2021:5584997.                             | The intervention of interest was not meta-analyzed separately from other interventions (Tai chi and qigong were mixed in the same meta-analysis for low back pain). |
| 86. | Liddle SD, et al. Interventions for preventing and treating low-back and pelvic pain during pregnancy. Cochrane Database Syst Rev. 2015 Sep 30;2015(9):CD001139.                                        | Pregnancy-related low back pain.                                                                                                                                    |
| 87. | Lin HT, et al. A Scoping Review of The Efficacy of Virtual Reality and Exergaming on Patients of Musculoskeletal System Disorder. J Clin Med. 2019 Jun 4;8(6):791.                                      | The intervention of interest was not meta-analyzed.                                                                                                                 |
| 88. | Liu B, et al. The efficacy and safety of Health Qigong for ankylosing spondylitis: Protocol for a systematic review and meta-analysis. Medicine (Baltimore). 2020 Jan;99(3):e18734.                     | Review protocol.                                                                                                                                                    |
| 89. | Liu W, et al. Effects of traditional qigong exercise on ankylosing spondylitis: a protocol for systematic reviews and meta-analysis. BMJ Open. 2021 Apr 21;11(4):e046188.                               | Review protocol.                                                                                                                                                    |
| 90. | Lorenc A, et al. Scoping review of systematic reviews of complementary medicine for musculoskeletal and mental health conditions. BMJ Open. 2018 Oct 15;8(10):e020222.                                  | Overview of reviews.                                                                                                                                                |



|     | Review excluded                                                                                                                                                                                                                                                                               | Reason                                                                                  |
|-----|-----------------------------------------------------------------------------------------------------------------------------------------------------------------------------------------------------------------------------------------------------------------------------------------------|-----------------------------------------------------------------------------------------|
| 91. | Macedo LG, et al. Motor control exercise for persistent, nonspecific low back pain: a systematic review. <i>Phys Ther.</i> 2009 Jan;89(1):9-25.                                                                                                                                               | No intervention of interest.                                                            |
| 92. | Macedo LG, et al. Physical therapy interventions for degenerative lumbar spinal stenosis: a systematic review. <i>Phys Ther.</i> 2013 Dec;93(12):1646-60.                                                                                                                                     | No intervention of interest.                                                            |
| 93. | Majid SS, et al. Effect of yoga intervention among patients undergoing low back pain treatment: a literature review. <i>Enfermería Clínica.</i> 2020;20(S2):177-81.                                                                                                                           | The intervention of interest was not meta-analyzed.                                     |
| 94. | Manheimer E, et al. Evidence from the Cochrane Collaboration for Traditional Chinese Medicine therapies. <i>J Altern Complement Med.</i> 2009 Sep;15(9):1001-14.                                                                                                                              | Overview of reviews.                                                                    |
| 95. | Marks R. Qigong and Musculoskeletal Pain. <i>Curr Rheumatol Rep.</i> 2019 Nov 16;21(11):59.                                                                                                                                                                                                   | The intervention of interest was not meta-analyzed.                                     |
| 96. | Martinez-Calderon J, et al. Which Interventions Enhance Pain Self-efficacy in People With Chronic Musculoskeletal Pain? A Systematic Review With Meta-analysis of Randomized Controlled Trials, Including Over 12 000 Participants. <i>J Orthop Sports Phys Ther.</i> 2020 Aug;50(8):418-430. | The intervention of interest was not meta-analyzed separately from other interventions. |
| 97. | McGregor AH, et al. Rehabilitation following surgery for lumbar spinal stenosis. <i>Cochrane Database Syst Rev.</i> 2013 Dec 9;(12):CD009644.                                                                                                                                                 | No intervention of interest.                                                            |
| 98. | Meereis Lemos ECW, et al. Influence of strength training and multicomponent training on the functionality of older adults: systematic review and meta-analysis. <i>Rev Bras Cineantropom Hum.</i> 2020;22:e60707.                                                                             | The intervention of interest was not meta-analyzed separately from other interventions. |
| 99. | Merepeza A. Effects of spinal manipulation versus therapeutic exercise on adults with chronic low back pain: a literature review. <i>J Can Chiropr Assoc.</i> 2014 Dec;58(4):456-66.                                                                                                          | No intervention of interest.                                                            |
| 100 | Mooventhan A. A comprehensive review on scientific evidence-based effects (including adverse effects) of yoga for normal and high-risk pregnancy-related health problems. <i>J Bodyw Mov Ther.</i> 2019 Oct;23(4):721-727.                                                                    | Pregnancy-related low back pain.                                                        |
| 101 | Morone NE, et al. Mind-body interventions for chronic pain in older adults: a structured review. <i>Pain Med.</i> 2007 May-Jun;8(4):359-75.                                                                                                                                                   | The intervention of interest was not meta-analyzed.                                     |
| 102 | Mottola MF, et al. 2019 Canadian guideline for physical activity throughout pregnancy. <i>Br J Sports Med.</i> 2018 Nov;52(21):1339-1346.                                                                                                                                                     | Pregnancy-related low back pain.                                                        |

|     | Review excluded                                                                                                                                                                                                                                                                                                                                                                           | Reason                                                                                  |
|-----|-------------------------------------------------------------------------------------------------------------------------------------------------------------------------------------------------------------------------------------------------------------------------------------------------------------------------------------------------------------------------------------------|-----------------------------------------------------------------------------------------|
| 103 | Murthy V, et al. An integrative review of complementary and alternative medicine use for back pain: a focus on prevalence, reasons for use, influential factors, self-perceived effectiveness, and communication. <i>Spine J.</i> 2015 Aug 1;15(8):1870-83.                                                                                                                               | The intervention of interest was not meta-analyzed.                                     |
| 104 | Nascimento PRCD, et al. Effectiveness of interventions for non-specific low back pain in older adults. A systematic review and meta-analysis. <i>Physiotherapy.</i> 2019 Jun;105(2):147-162.                                                                                                                                                                                              | One randomized controlled trial of interest was only meta-analyzed.                     |
| 105 | Nelson EA, et al. Systematic review of the efficacy of pre-surgical mind-body based therapies on post-operative outcome measures. <i>Complement Ther Med.</i> 2013 Dec;21(6):697-711.                                                                                                                                                                                                     | No intervention of interest.                                                            |
| 106 | Ng BH, et al. Psychophysiological outcomes of health qigong for chronic conditions: a systematic review. <i>Psychophysiology.</i> 2009 Mar;46(2):257-69.                                                                                                                                                                                                                                  | Chronic spinal pain was not meta-analyzed separately from other conditions.             |
| 107 | O'Keeffe M, et al. Comparative Effectiveness of Conservative Interventions for Nonspecific Chronic Spinal Pain: Physical, Behavioral/Psychologically Informed, or Combined? A Systematic Review and Meta-Analysis. <i>J Pain.</i> 2016 Jul;17(7):755-74.                                                                                                                                  | The intervention of interest was not meta-analyzed separately from other interventions. |
| 108 | Olsen PØ, et al. Effects of resistance training on self-reported disability in older adults with functional limitations or disability - a systematic review and meta-analysis. <i>Eur Rev Aging Phys Act.</i> 2019 Dec 7;16:24.                                                                                                                                                           | No chronic spinal pain.                                                                 |
| 109 | Park J, et al. A Narrative Review of Movement-Based Mind-Body Interventions: Effects of Yoga, Tai Chi, and Qigong for Back Pain Patients. <i>Holist Nurs Pract.</i> 2020 Jan/Feb;34(1):3-23.                                                                                                                                                                                              | The intervention of interest was not meta-analyzed.                                     |
| 110 | Paul CL, et al. The impact of web-based approaches on psychosocial health in chronic physical and mental health conditions. <i>Health Educ Res.</i> 2013 Jun;28(3):450-71.                                                                                                                                                                                                                | No chronic spinal pain.                                                                 |
| 111 | Peek AL, et al. Different forms of exercise for chronic low back pain (PEDro synthesis). <i>Br J Sports Med.</i> 2016 Feb;50(3):188. (This study was based on Searle A, Spink M, Ho A, Chuter V. Exercise interventions for the treatment of chronic low back pain: a systematic review and meta-analysis of randomised controlled trials. <i>Clin Rehabil.</i> 2015 Dec;29(12):1155-67.) | The intervention of interest was not meta-analyzed separately from other interventions. |
| 112 | Petersen CM, et al. Proprioception interventions to improve cervical position sense in cervical pathology. <i>International Journal of Therapy and Rehabilitation.</i> 2013;20(3):154-63.                                                                                                                                                                                                 | No intervention of interest.                                                            |
| 113 | Phadsri S, et al. Nonpharmacological Treatment for Supporting Social Participation of Adults with Depression. <i>Occup Ther Int.</i> 2021 Apr 29;2021:8850364.                                                                                                                                                                                                                            | No chronic spinal pain.                                                                 |

|     | Review excluded                                                                                                                                                                                                                                                                    | Reason                                              |
|-----|------------------------------------------------------------------------------------------------------------------------------------------------------------------------------------------------------------------------------------------------------------------------------------|-----------------------------------------------------|
| 114 | Posadzki P, et al. Is yoga effective for pain? A systematic review of randomized clinical trials. <i>Complement Ther Med</i> . 2011 Oct;19(5):281-7.                                                                                                                               | The intervention of interest was not meta-analyzed. |
| 115 | Quentin C, et al. Effect of Home Exercise Training in Patients with Nonspecific Low-Back Pain: A Systematic Review and Meta-Analysis. <i>Int J Environ Res Public Health</i> . 2021 Aug 10;18(16):8430.                                                                            | Data unavailable.                                   |
| 116 | Quinn F, et al. Complementary and alternative medicine in the treatment of low back pain: A systematic review. <i>Physical Therapy Reviews</i> . 2006;11:107-16.                                                                                                                   | The intervention of interest was not meta-analyzed. |
| 117 | Ranjeeta A, et al. Physiotherapy Management of Chronic Back Pain: Systematic Literature Review. <i>Indian Journal of Physiotherapy and Occupational Therapy</i> . 2011;5(4):167-70.                                                                                                | The intervention of interest was not meta-analyzed. |
| 118 | Regnaud JP, et al. Exercise programmes for ankylosing spondylitis. <i>Cochrane Database Syst Rev</i> . 2019 Oct 2;10(10):CD011321.                                                                                                                                                 | No intervention of interest.                        |
| 119 | Reid KF, et al. The Effects of Tai Chi Mind-Body Approach on the Mechanisms of Gulf War Illness: an Umbrella Review. <i>Integr Med Res</i> . 2019 Sep;8(3):167-172.                                                                                                                | Overview of reviews.                                |
| 120 | Rothberg S, et al. Complementary therapies in addition to medication for patients with nonchronic, nonradicular low back pain: a systematic review. <i>Am J Emerg Med</i> . 2017 Jan;35(1):55-61.                                                                                  | No chronic spinal pain.                             |
| 121 | Schoutens C, et al. Outcomes of Nonsurgical Treatments for Symptomatic Adult Degenerative Scoliosis: A Systematic Review. <i>Pain Med</i> . 2020 Jun 1;21(6):1263-1275.                                                                                                            | The intervention of interest was not meta-analyzed. |
| 122 | Sexton BP, et al. To sit or not to sit? A systematic review and meta-analysis of seated exercise for older adults. <i>Australas J Ageing</i> . 2019 Mar;38(1):15-27.                                                                                                               | No chronic spinal pain.                             |
| 123 | Sharma M, et al. Yoga as an Alternative and Complementary Treatment for Patients With Low Back Pain: A Systematic Review. <i>Journal of Evidence-Based Complementary &amp; Alternative Medicine</i> . 2013;18(1):23-8.                                                             | The intervention of interest was not meta-analyzed. |
| 124 | Singh A, et al. Yoga for Neck Pain: A Review. <i>Alternative and Complementary Therapies</i> . 2020;26(5):205-09.                                                                                                                                                                  | The intervention of interest was not meta-analyzed. |
| 125 | Southerst D, et al. Is exercise effective for the management of neck pain and associated disorders or whiplash-associated disorders? A systematic review by the Ontario Protocol for Traffic Injury Management (OPTIMA) Collaboration. <i>Spine J</i> . 2016 Dec;16(12):1503-1523. | The intervention of interest was not meta-analyzed. |

|     | Review excluded                                                                                                                                                                                                   | Reason                                                                                  |
|-----|-------------------------------------------------------------------------------------------------------------------------------------------------------------------------------------------------------------------|-----------------------------------------------------------------------------------------|
| 126 | Sun W, et al. Comparative efficacy of 12 non-drug interventions on non-specific chronic low back pain in nurses: A systematic review and network meta-analysis. J Back Musculoskelet Rehabil. 2021;34(4):499-510. | Network meta-analysis.                                                                  |
| 127 | Sutar R, et al. Yoga intervention and functional pain syndromes: a selective review. Int Rev Psychiatry. 2016 Jun;28(3):316-22.                                                                                   | Review with mixed designs (e.g., systematic reviews and trials).                        |
| 128 | Swathi PS, et al. Health and therapeutic benefits of Shatkarma: A narrative review of scientific studies. J Ayurveda Integr Med. 2021 Jan-Mar;12(1):206-212.                                                      | The intervention of interest was not meta-analyzed.                                     |
| 129 | Tan G, et al. Efficacy of selected complementary and alternative medicine interventions for chronic pain. J Rehabil Res Dev. 2007;44(2):195-222.                                                                  | The intervention of interest was not meta-analyzed.                                     |
| 130 | Toneti BF, et al. Benefits of Qigong as an integrative and complementary practice for health: a systematic review. Rev Lat Am Enfermagem. 2020;28:e3317.                                                          | The intervention of interest was not meta-analyzed.                                     |
| 131 | Tsang TW, et al. Health benefits of Kung Fu: a systematic review. J Sports Sci. 2008 Oct;26(12):1249-67.                                                                                                          | The intervention of interest was not meta-analyzed.                                     |
| 132 | Tsang HW, et al. Effects of mindful and non-mindful exercises on people with depression: a systematic review. Br J Clin Psychol. 2008 Sep;47(Pt 3):303-22.                                                        | The intervention of interest was not meta-analyzed.                                     |
| 133 | Tulloch A, et al. Yoga-based exercise improves health-related quality of life and mental well-being in older people: a systematic review of randomised controlled trials. Age Ageing. 2018 Jul 1;47(4):537-544.   | Chronic spinal pain was not meta-analyzed separately from other conditions.             |
| 134 | van Benten E, et al. Recommendations for physical therapists on the treatment of lumbopelvic pain during pregnancy: a systematic review. J Orthop Sports Phys Ther. 2014 Jul;44(7):464-73, A1-15.                 | Pregnancy-related low back pain.                                                        |
| 135 | van der Velde G, et al. Identifying the best treatment among common nonsurgical neck pain treatments: a decision analysis. J Manipulative Physiol Ther. 2009 Feb;32(2 Suppl):S209-18.                             | No intervention of interest.                                                            |
| 136 | Wang XQ, et al. A meta-analysis of core stability exercise versus general exercise for chronic low back pain. PLoS One. 2012;7(12):e52082.                                                                        | The intervention of interest was not meta-analyzed separately from other interventions. |

|     | Review excluded                                                                                                                                                                                                            | Reason                                                                                                                                                                                   |
|-----|----------------------------------------------------------------------------------------------------------------------------------------------------------------------------------------------------------------------------|------------------------------------------------------------------------------------------------------------------------------------------------------------------------------------------|
| 137 | Wasser JG, et al. Exercise Benefits for Chronic Low Back Pain in Overweight and Obese Individuals. PM R. 2017 Feb;9(2):181-192.                                                                                            | The intervention of interest was not meta-analyzed.                                                                                                                                      |
| 138 | Wei X, et al. The potential effect of Wujinxi exercise for primary osteoporosis: A systematic review and meta-analysis. Maturitas. 2015 Dec;82(4):346-54.                                                                  | One randomized controlled trial of interest was only meta-analyzed.                                                                                                                      |
| 139 | Wieland LS, et al. Evidence on yoga for health: A bibliometric analysis of systematic reviews. Complement Ther Med. 2021 Aug;60:102746.                                                                                    | Overview of reviews.                                                                                                                                                                     |
| 140 | Wilhelm MP, et al. The Effects of Exercise Dosage on Neck-Related Pain and Disability: A Systematic Review With Meta-analysis. J Orthop Sports Phys Ther. 2020 Nov;50(11):607-621.                                         | The intervention of interest was not meta-analyzed separately from other interventions.                                                                                                  |
| 141 | Williams ACC, et al. Psychological therapies for the management of chronic pain (excluding headache) in adults. Cochrane Database Syst Rev. 2020 Aug 12;8(8):CD007407.                                                     | No intervention of interest.                                                                                                                                                             |
| 142 | Wollesen B, et al. The effects of cognitive-motor training interventions on executive functions in older people: a systematic review and meta-analysis. Eur Rev Aging Phys Act. 2020 Jul 2;17:9.                           | No chronic spinal pain.                                                                                                                                                                  |
| 143 | Xie YH, et al. Traditional Chinese Mind and Body Exercises for Neck Pain: A Meta-Analysis of Randomized Controlled Trials. Pain Res Manag. 2021 Oct 1;2021:5426595.                                                        | The intervention of interest was not meta-analyzed separately from other interventions (Tai chi and qigong were mixed in the same meta-analysis for pain intensity and quality of life). |
| 144 | Yan Y, et al. Exercise vs Conventional Treatment for Treatment of Primary Osteoporosis: A Systematic Review and Meta-Analysis of Randomized Controlled Trials. Orthop Surg. 2021 Jul;13(5):1474-1487.                      | No chronic spinal pain.                                                                                                                                                                  |
| 145 | Yang GY, et al. Determining the safety and effectiveness of Tai Chi: A critical overview of 210 systematic reviews of controlled clinical trials. 2021. (This is a preprint).                                              | Overview of reviews.                                                                                                                                                                     |
| 146 | Ye J, et al. The Neuroscience of Nonpharmacological Traditional Chinese Therapy (NTCT) for Major Depressive Disorder: A Systematic Review and Meta-Analysis. Evid Based Complement Alternat Med. 2019 May 15;2019:2183403. | No chronic spinal pain.                                                                                                                                                                  |

|     | Review excluded                                                                                                                                                                                                                    | Reason                                                                                  |
|-----|------------------------------------------------------------------------------------------------------------------------------------------------------------------------------------------------------------------------------------|-----------------------------------------------------------------------------------------|
| 147 | Yohannes AM, et al. Management of depression in older people with osteoarthritis: A systematic review. <i>Aging &amp; Mental Health</i> . 2010;14(6):637-51.                                                                       | The intervention of interest was not meta-analyzed.                                     |
| 148 | Yu H, et al. TCM nonpharmacological interventions for chronic low-back pain: A protocol for systematic review and network meta-analysis. <i>Medicine (Baltimore)</i> . 2020 Oct 2;99(40):e22547.                                   | Review protocol.                                                                        |
| 149 | Zhang SK, et al. Effects of Low Back Pain Exercises on Pain Symptoms and Activities of Daily Living: A Systematic Review and Meta-Analysis. <i>Percept Mot Skills</i> . 2022 Feb;129(1):63-89.                                     | The intervention of interest was not meta-analyzed separately from other interventions. |
| 150 | Zhang YH, et al. Exercise for Neuropathic Pain: A Systematic Review and Expert Consensus. <i>Front Med (Lausanne)</i> . 2021 Nov 24;8:756940.                                                                                      | Review with mixed designs (e.g., systematic reviews and trials).                        |
| 151 | Zhao Q, et al. The effectiveness of aquatic physical therapy intervention on disease activity and function of ankylosing spondylitis patients: a meta-analysis. <i>Psychol Health Med</i> . 2020 Aug;25(7):832-843.                | No intervention of interest.                                                            |
| 152 | Zhao J, et al. The effects of sitting Tai Chi on physical and psychosocial health outcomes among individuals with impaired physical mobility: A systematic review and meta-analysis. <i>Int J Nurs Stud</i> . 2021 Jun;118:103911. | No chronic spinal pain.                                                                 |
| 153 | Zhou J, et al. Characteristic of Clinical Studies on Baduanjin during 2000-2019: A Comprehensive Review. <i>Evid Based Complement Alternat Med</i> . 2020 Oct 16;2020:4783915.                                                     | Review with mixed designs (e.g., systematic reviews and trials).                        |
| 154 | Zhuang Q, et al. Effect of Yijinjing exercise on cervical spondylosis: A protocol for systematic review. <i>Medicine (Baltimore)</i> . 2020 Jul 2;99(27):e20764.                                                                   | Review protocol.                                                                        |
